# Supplementary material for: When Emotional Intelligence Backfires
Source: Atypon-hosted journal article supplement (doi:10.1027/1614-0001/a000324), 2020-06-03
Supplement: 1614-0001_a000324_esm1.pdf [file 1614-0001_a000324_esm1.pdf]

When emotional intelligence backfires: Interactions between intra- and interpersonal  
emotional competencies in the case of parental burnout

**Electronic Supplementary Material, ESM1**

Means, standard deviations, Skewness and Kurtosis indices, and bivariate Pearson  
correlations of trait variables with relevant demographic variables

|                  |                | <i>M</i> | <i>SD</i> | Skewness | Kurtosis | Educ | Num   | Young |
|------------------|----------------|----------|-----------|----------|----------|------|-------|-------|
| Parental burnout |                | 60.74    | 29.67     | 1.15     | 0.71     | -.09 | .12*  | -.10  |
| Intrapersonal EC | General        | 3.33     | 0.59      | -0.07    | -0.42    | .15* | -.007 | .06   |
|                  | Identification | 3.55     | 0.76      | -0.29    | -0.31    | .09  | -.03  | .05   |
|                  | Understanding  | 3.49     | 0.84      | -0.29    | -0.63    | .14* | -.005 | .07   |
|                  | Expression     | 3.33     | 0.79      | -0.30    | -0.41    | .15* | .02   | .05   |
|                  | Regulation     | 2.76     | 0.80      | 0.09     | -0.30    | .14* | .006  | .10   |
|                  | Use            | 3.53     | 0.77      | -0.29    | -0.05    | .06  | -.03  | -.02  |
| Interpersonal EC | General        | 3.41     | 0.52      | -0.15    | -0.11    | .10  | .004  | .04   |
|                  | Identification | 3.89     | 0.68      | -0.49    | 0.09     | .02  | .02   | .03   |
|                  | Understanding  | 3.69     | 0.68      | -0.22    | -0.21    | .13* | .001  | .05   |
|                  | Listening      | 3.86     | 0.73      | -0.54    | 0.02     | .01  | .07   | .04   |
|                  | Regulation     | 3.07     | 0.67      | -0.09    | 0.07     | .09  | -.01  | .05   |
|                  | Use            | 2.56     | 0.83      | 0.31     | -0.52    | .10  | -.06  | .001  |
| Total EC         |                | 3.37     | 0.49      | -0.04    | -0.34    | .15* | -.004 | .06   |

Educ = level of education ; Num = number of children ; Young = age of the youngest child

\*Bonferroni corrected p-value < .001
